# Supplementary material
Source: HighWire-hosted journal article supplement (http://heart.bmjjournals.com/highwire/filestream/125368/field_highwire_adjunct_files/0/ONLINE_SUPPLEMENT.pdf)
Supplement: ONLINE_SUPPLEMENT.pdf [file ONLINE_SUPPLEMENT.pdf]

ONLINE SUPPLEMENT

S1. Medication usage patterns in elderly patients with definite NVAF, stratified by CHADS<sub>2</sub> and CHA<sub>2</sub>DS<sub>2</sub>-VASc risk categories.

| Risk Categories | CHADS <sub>2</sub> |                       |               |         | CHA <sub>2</sub> DS <sub>2</sub> -VASc |               |         |
|-----------------|--------------------|-----------------------|---------------|---------|----------------------------------------|---------------|---------|
|                 | Low (n=936)        | Intermediate (n=2393) | High (n=5451) | P Value | Intermediate (n=395)                   | High (n=8385) | P Value |
| ACE/ARB         | 170 (18.2)         | 855 (35.7)            | 2775 (50.9)   | <0.0001 | 62 (15.7)                              | 3738 (42.6)   | <0.0001 |
| Beta Blocker    | 358 (38.3)         | 904 (37.8)            | 2148 (39.4)   | 0.37    | 127 (32.2)                             | 3283 (37.4)   | 0.005   |
| CCB             | 157 (16.8)         | 416 (17.4)            | 780 (14.3)    | 0.001   | 61 (15.4)                              | 1292 (14.7)   | 1.00    |
| Digoxin         | 172 (18.4)         | 481 (20.1)            | 1395 (25.6)   | <0.0001 | 80 (20.3)                              | 1968 (22.4)   | 0.14    |
| Diuretic        | 159 (17.0)         | 801 (33.5)            | 2688 (49.3)   | <0.0001 | 51 (12.9)                              | 3597 (40.9)   | <0.0001 |
| Statin          | 165 (17.6)         | 427 (17.8)            | 1051 (19.3)   | 0.22    | 50 (12.7)                              | 1593 (18.1)   | 0.001   |
| Warfarin        | 467 (49.9)         | 1169 (48.9)           | 2668 (49.0)   | 0.85    | 203 (51.4)                             | 4101 (46.7)   | 0.35    |
| Anti-arrhythmic | 189 (20.2)         | 491 (20.5)            | 5451 (12.5)   | <0.0001 | 65 (16.4)                              | 1237 (14.1)   | 0.34    |

Values are n (%). Medication use defined as use within 90 days of the index AF diagnosis date. Pharmacotherapy cohort includes  $\geq 65$  years or older and therefore no low risk category CHA<sub>2</sub>DS<sub>2</sub>-VASc category.

Anti-arrhythmic user includes any use of amiodarone, propafenone, or sotalol.

ACE=angiotensin-converting enzyme, ARB= angiotensin receptor blocker, CCB = calcium channel blocker
